# Supplementary material for: Chaperone-Mediated Autophagy Markers LAMP2A and HSPA8 in Advanced Non-Small Cell Lung Cancer after Neoadjuvant Therapy
Source: MDPI journal article supplement (doi:10.3390/cells10102731), 2021-10-13
Supplement: s1 [file s1]

A

HR in the multivariable model for DFS including all cases

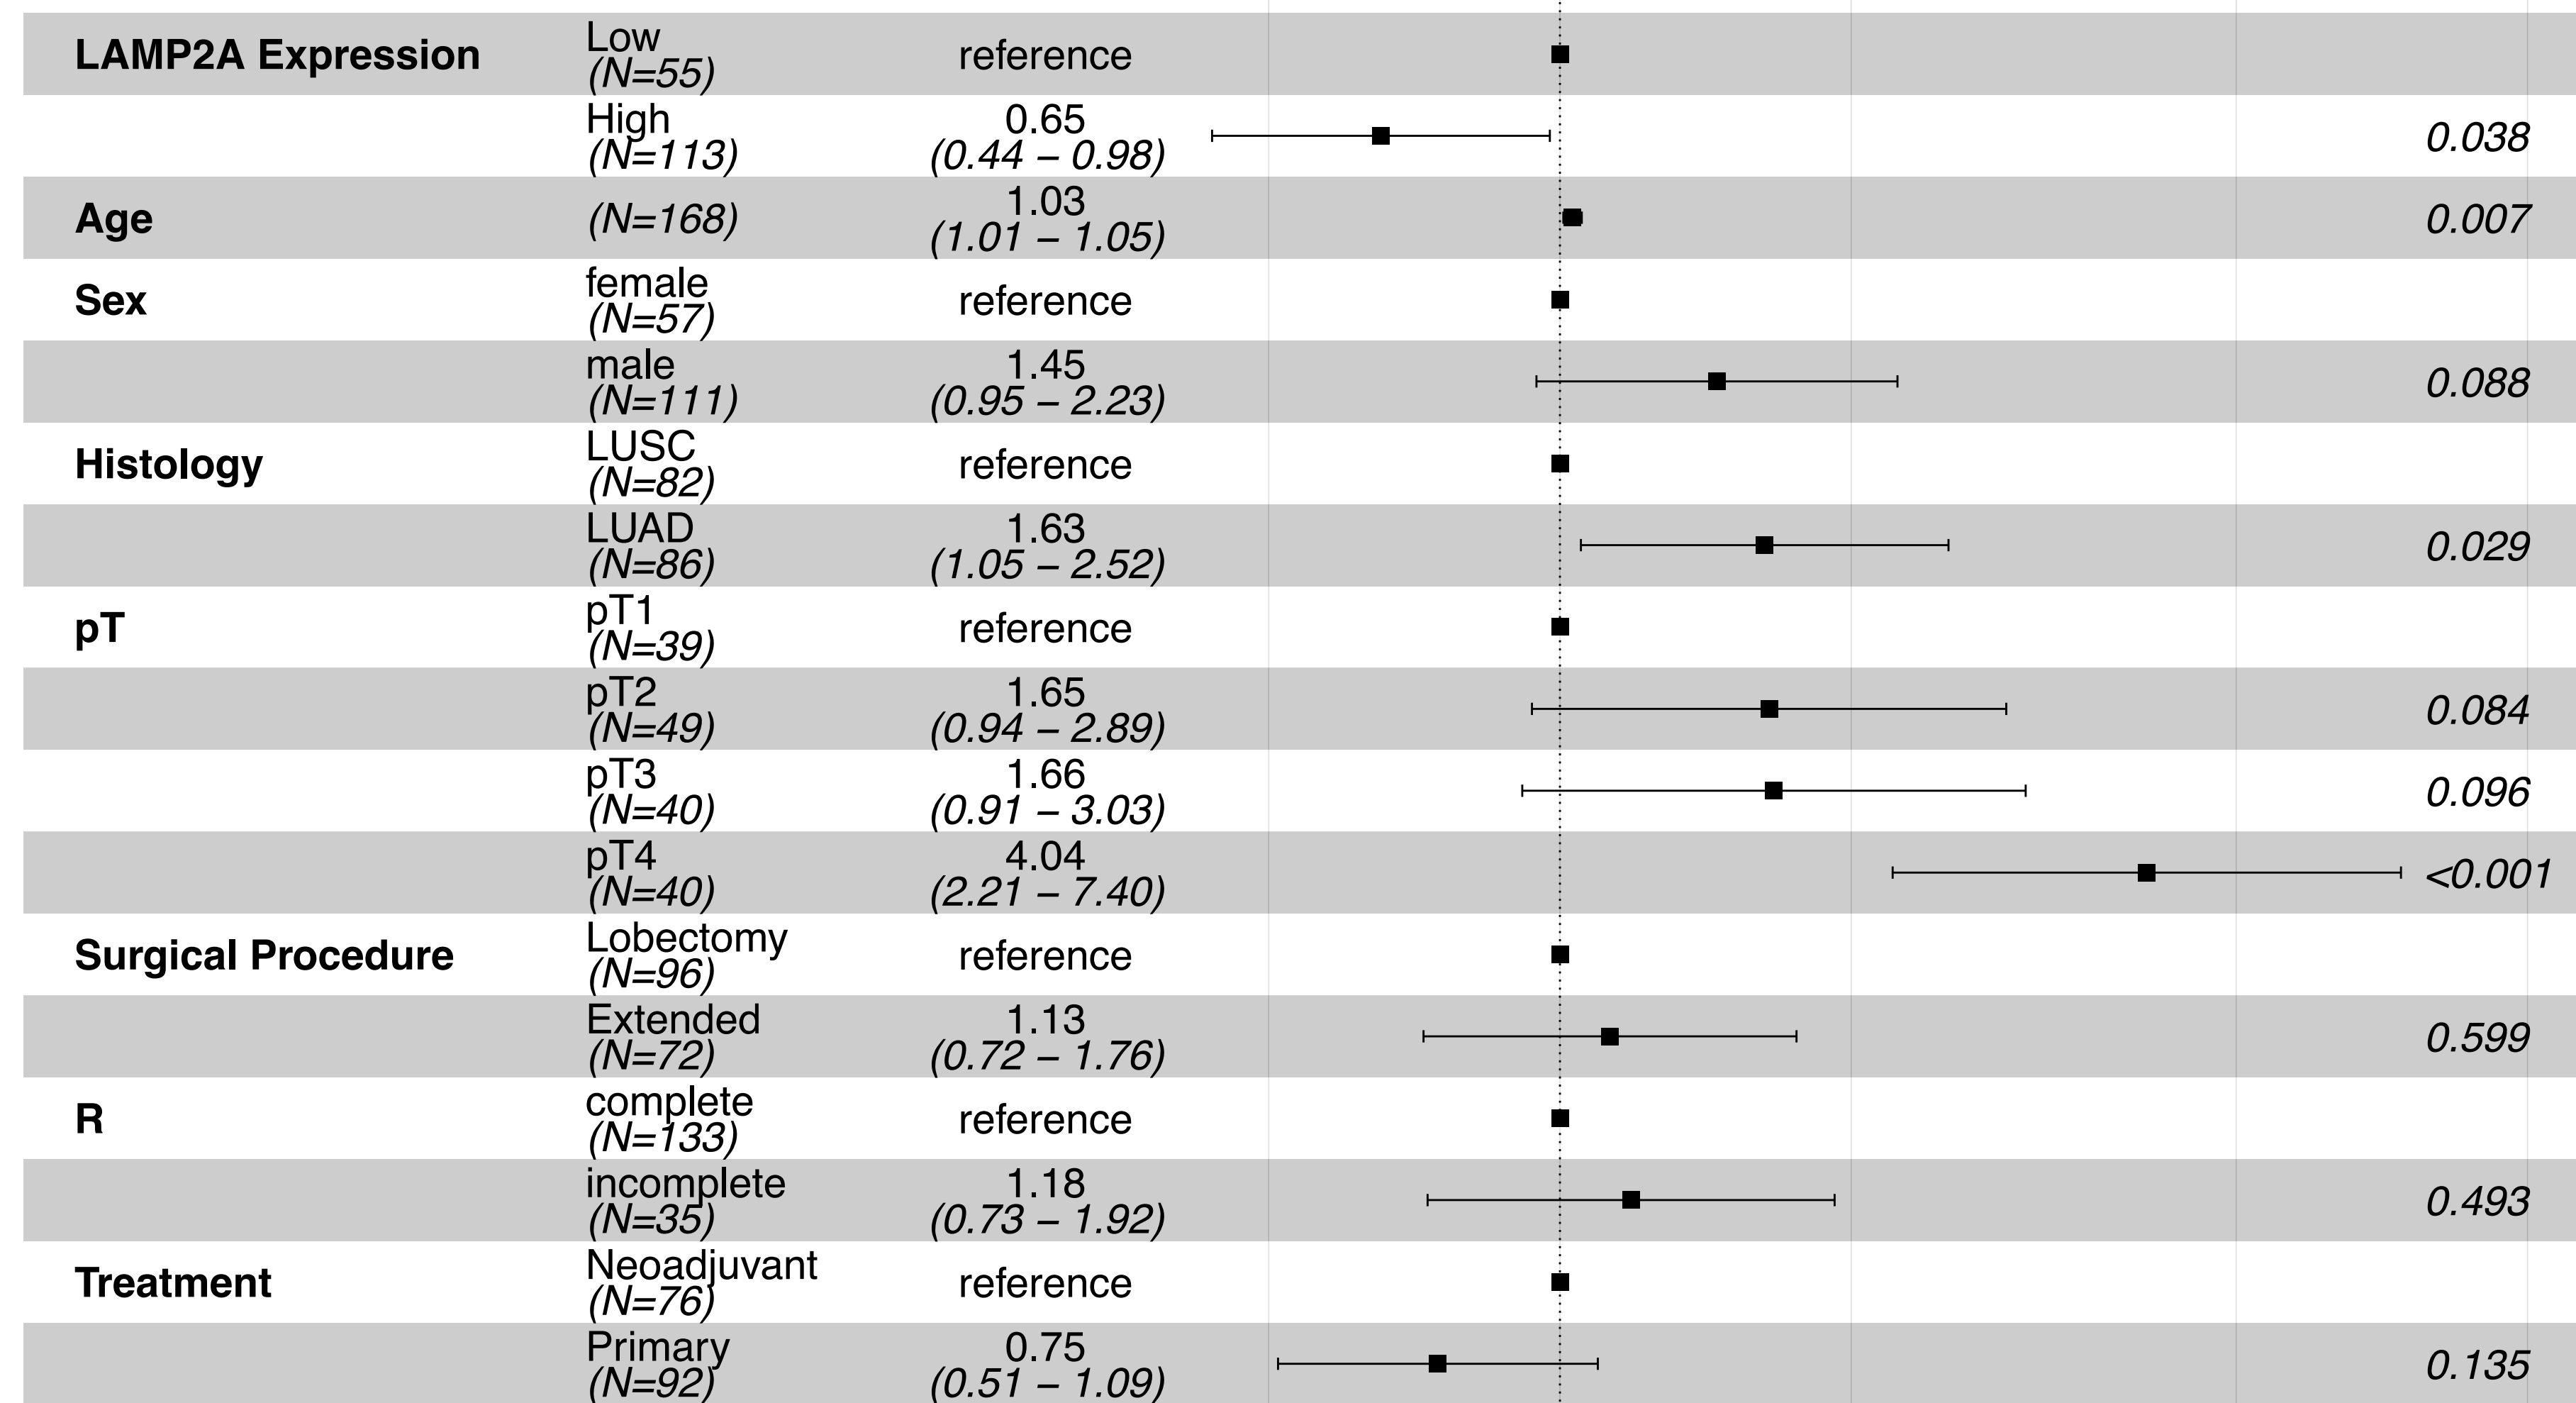

# Events: 113; Global p-value (Log-Rank): 1.2448e-06

AIC: 1004.12; Concordance Index: 0.69

B

HR in the multivariable model for DFS including only primary resected LUSC

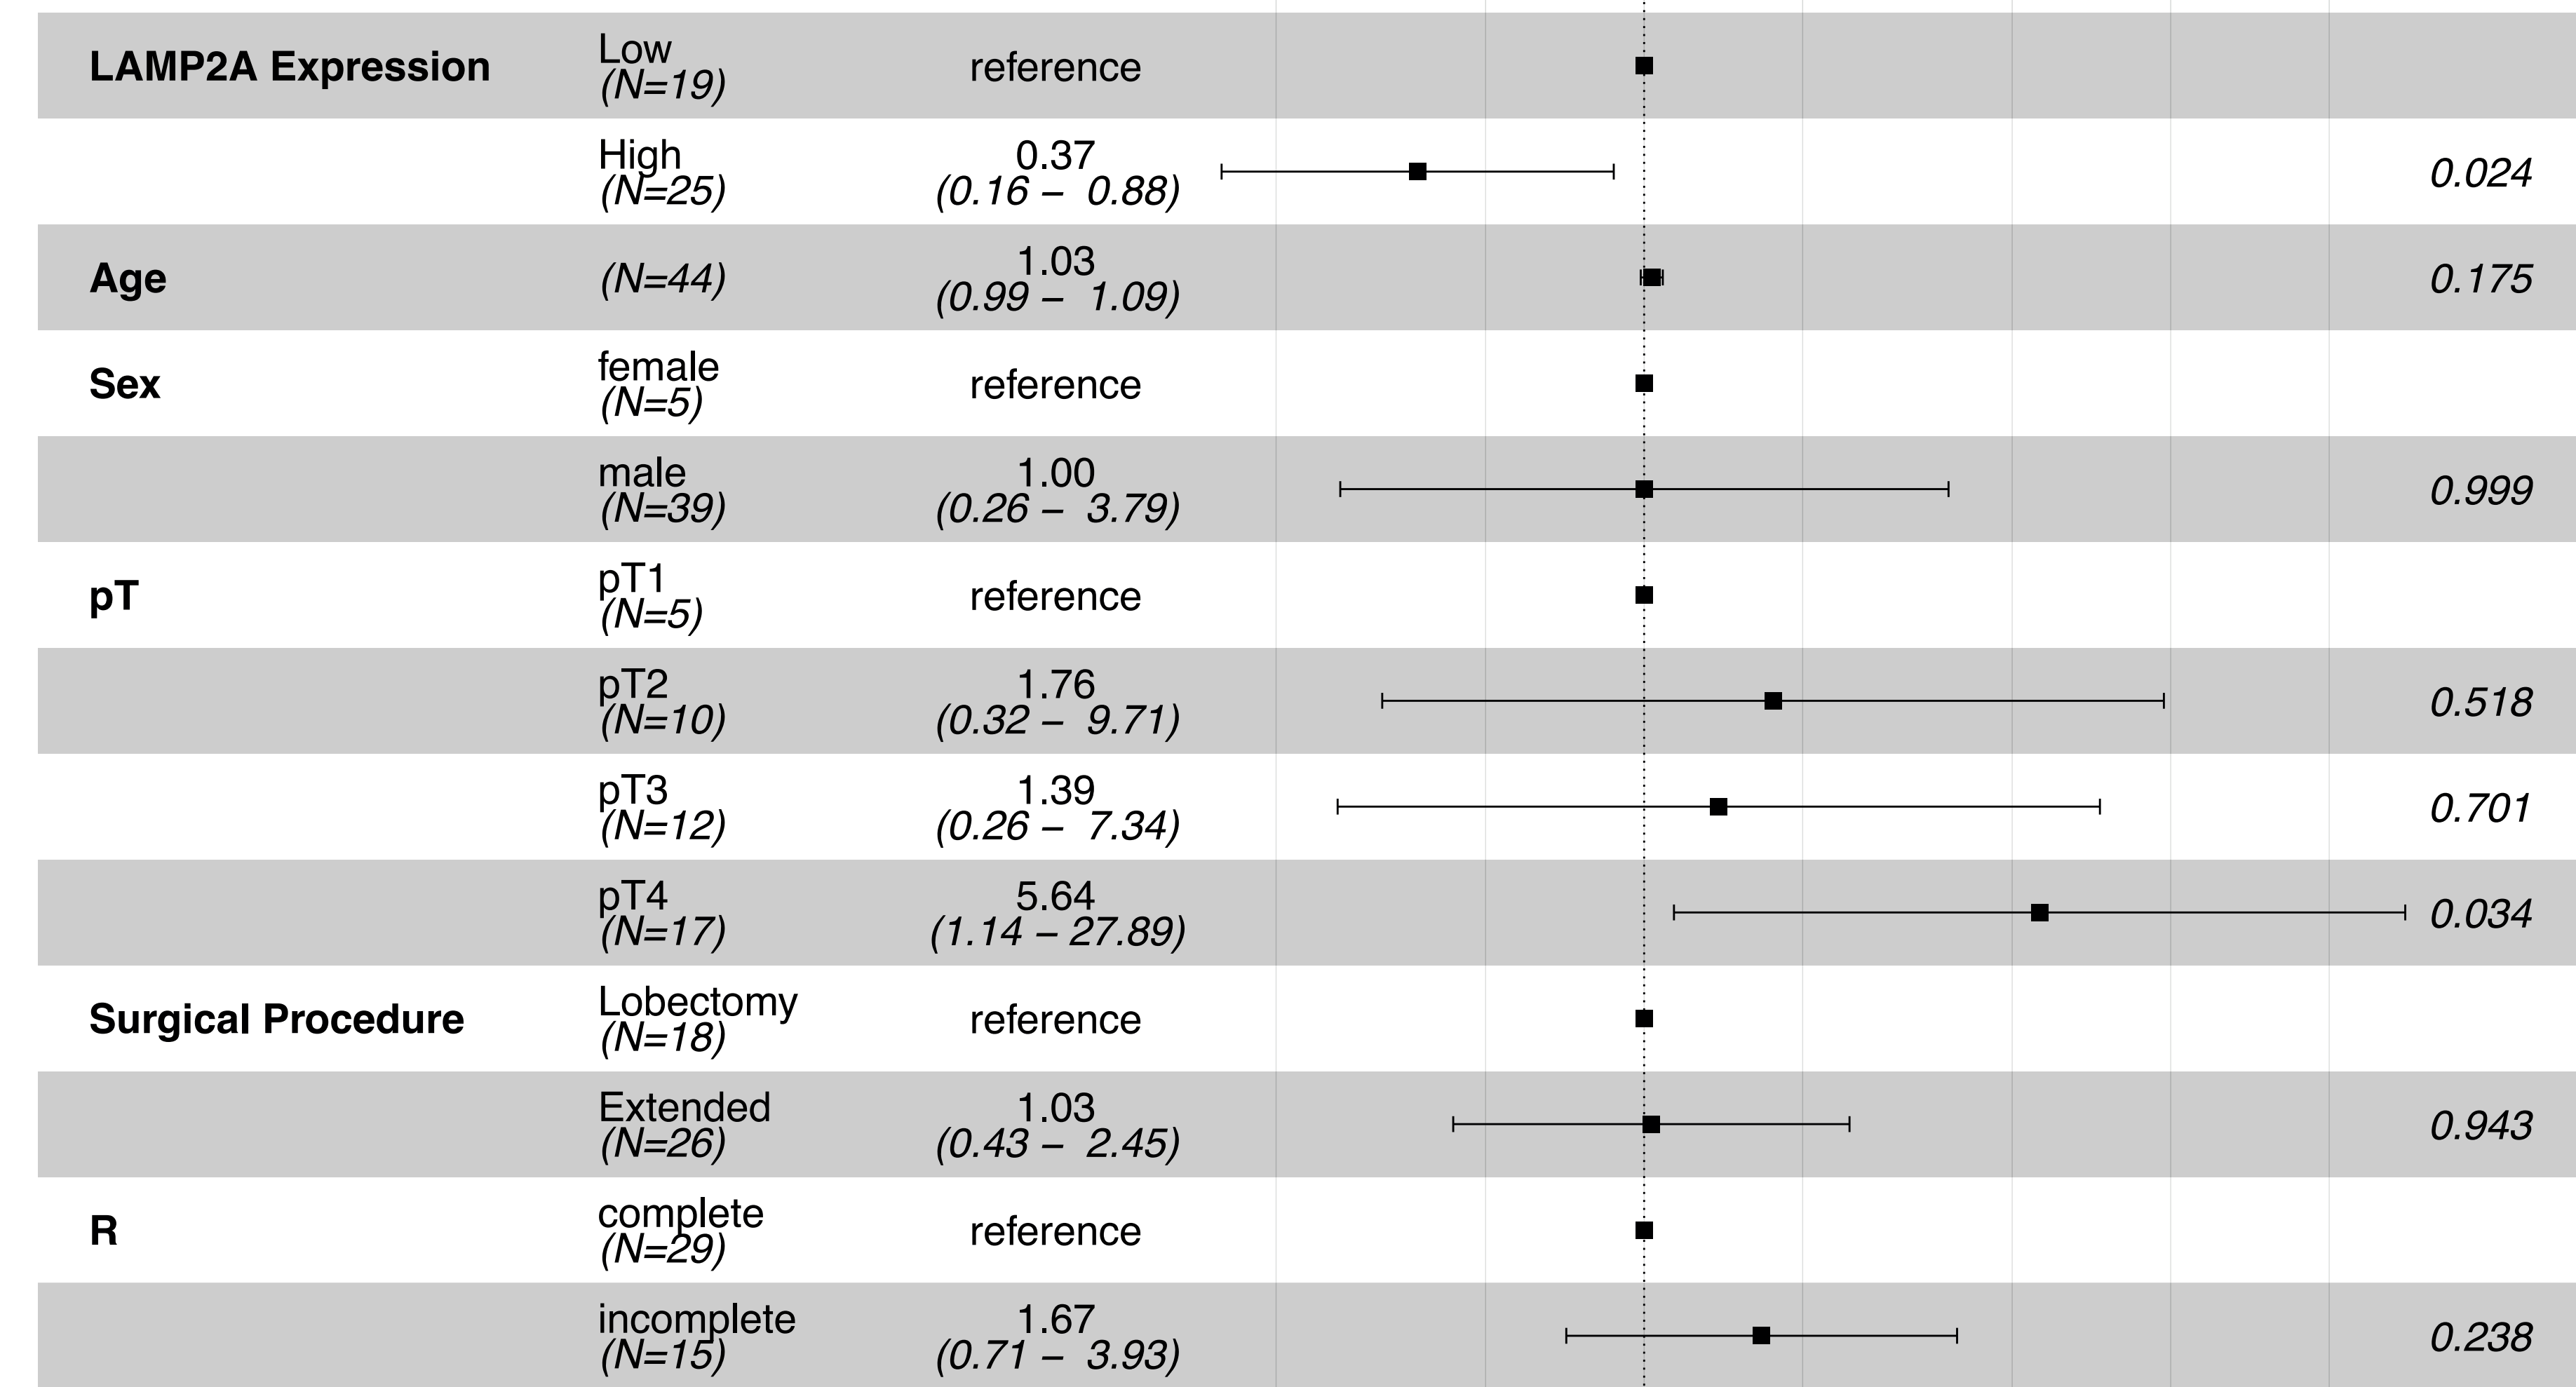

# Events: 28; Global p-value (Log-Rank): 0.0049563

AIC: 179.24; Concordance Index: 0.76
