# Supplementary material for: Chaperone-Mediated Autophagy Markers LAMP2A and HSPA8 in Advanced Non-Small Cell Lung Cancer after Neoadjuvant Therapy
Source: MDPI journal article supplement (doi:10.3390/cells10102731), 2021-10-13

**A** Number of cores per case after LAMP2A assessment

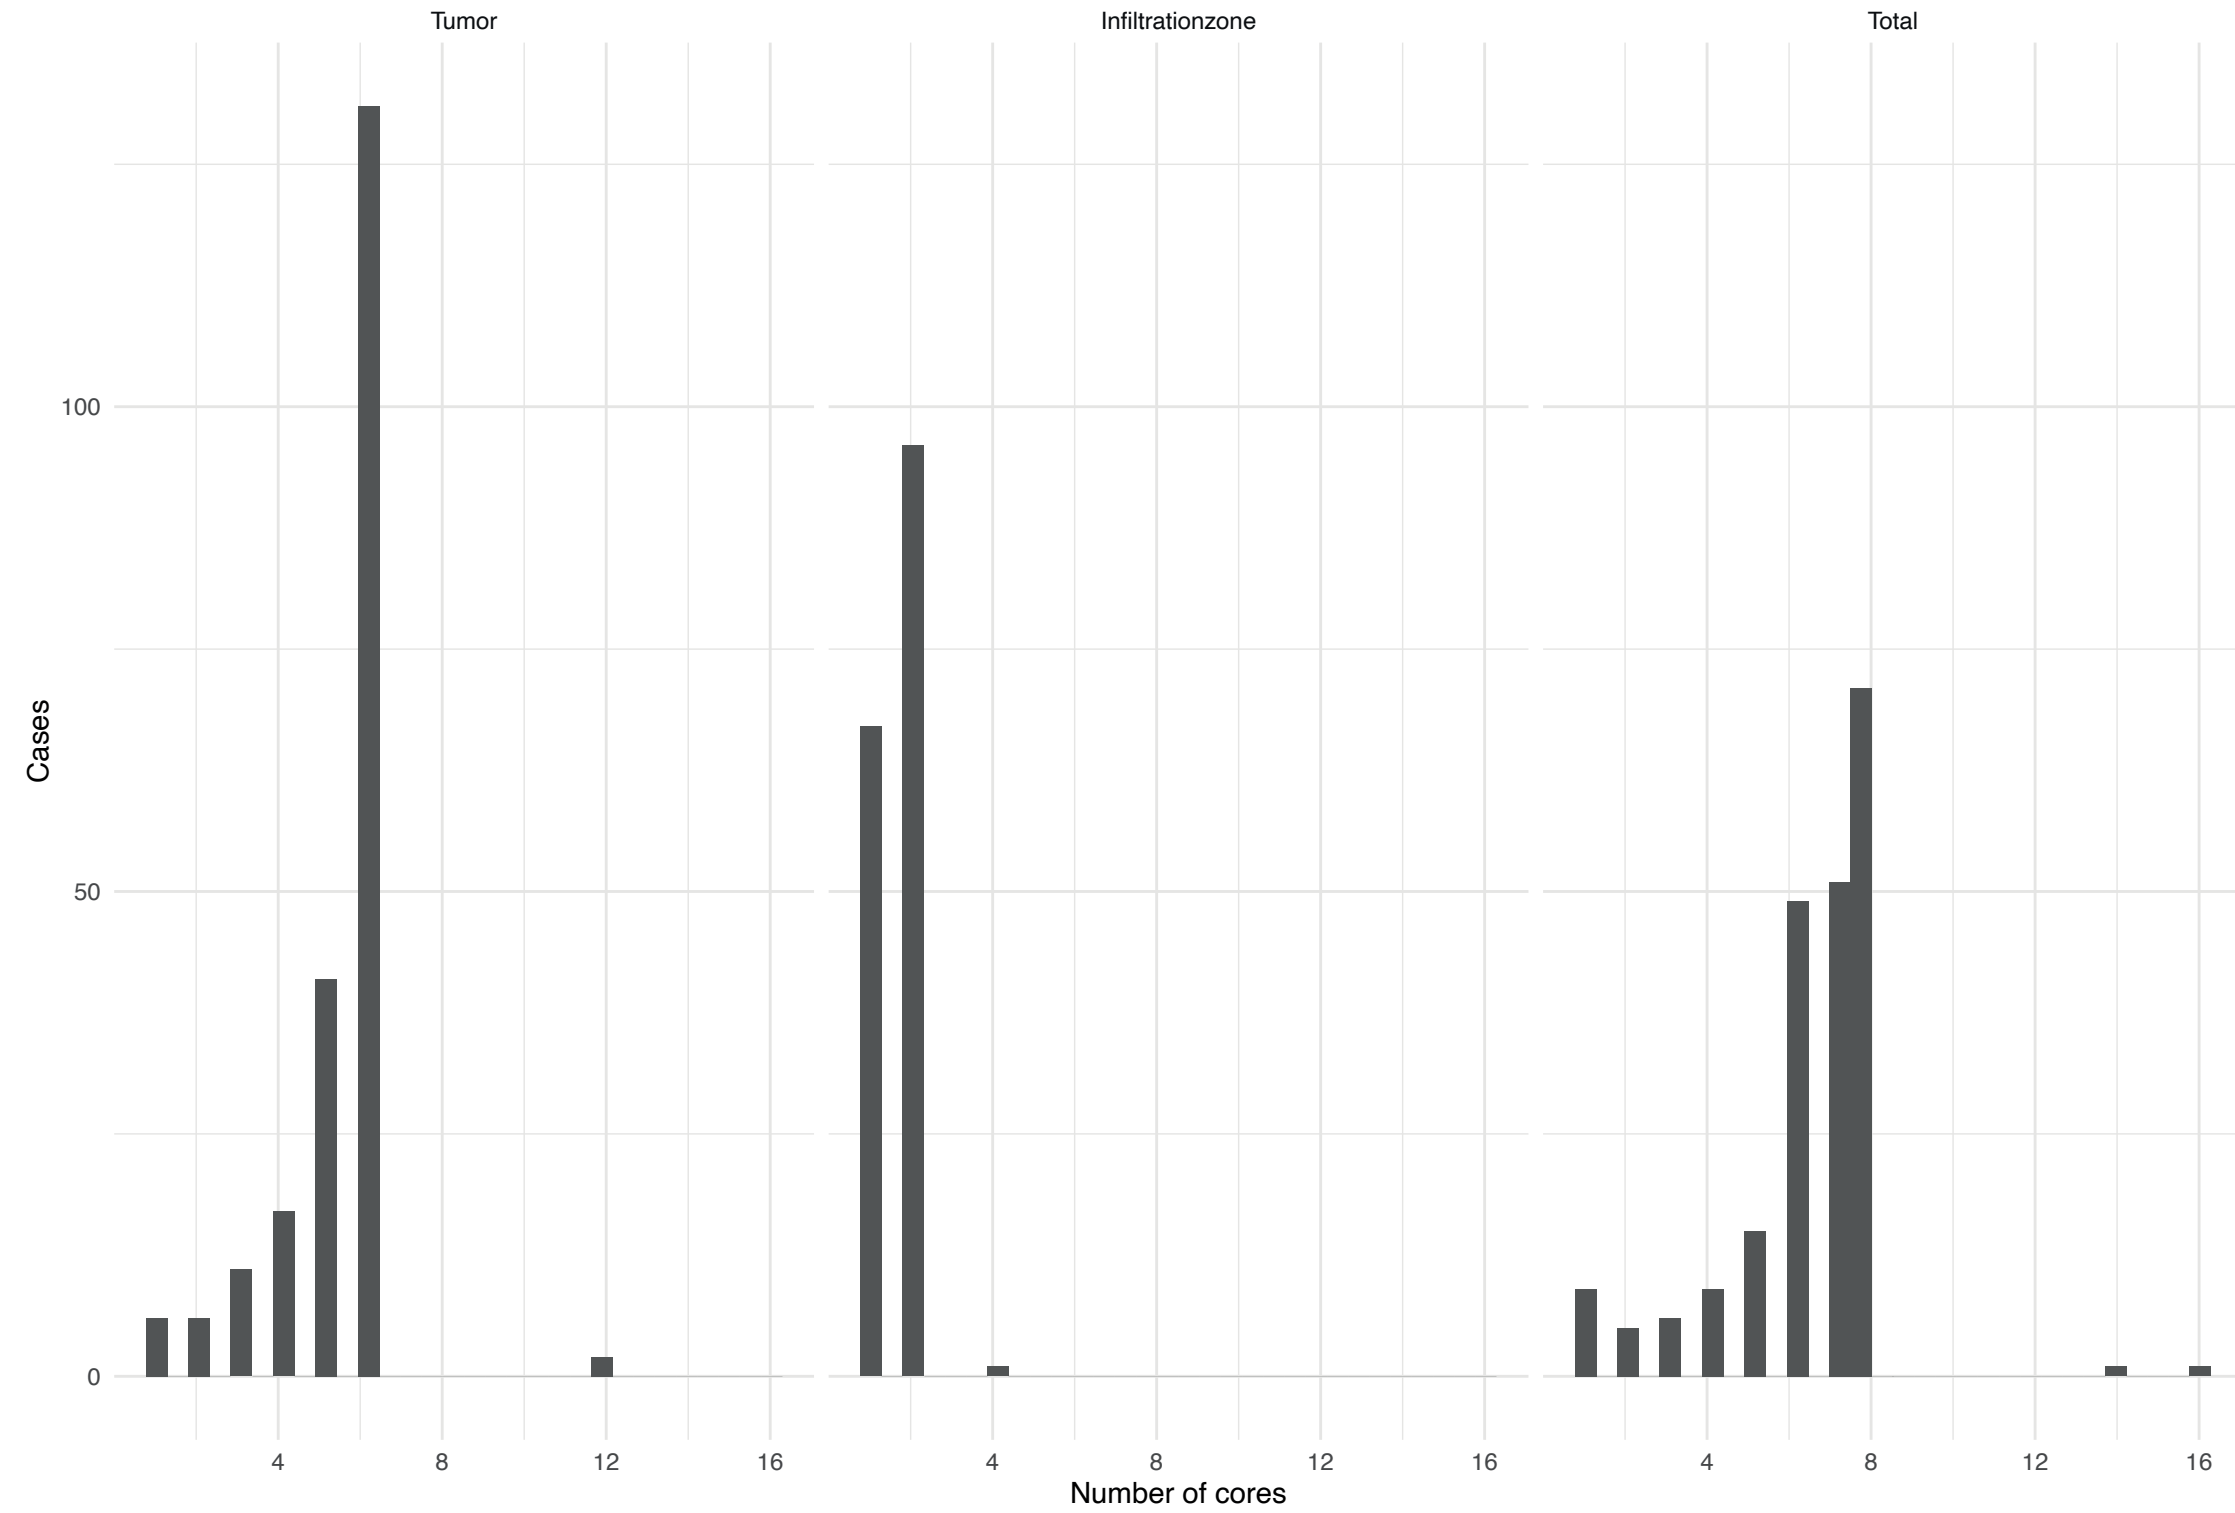

**B** Number of cores per case after HSPA8 assessment

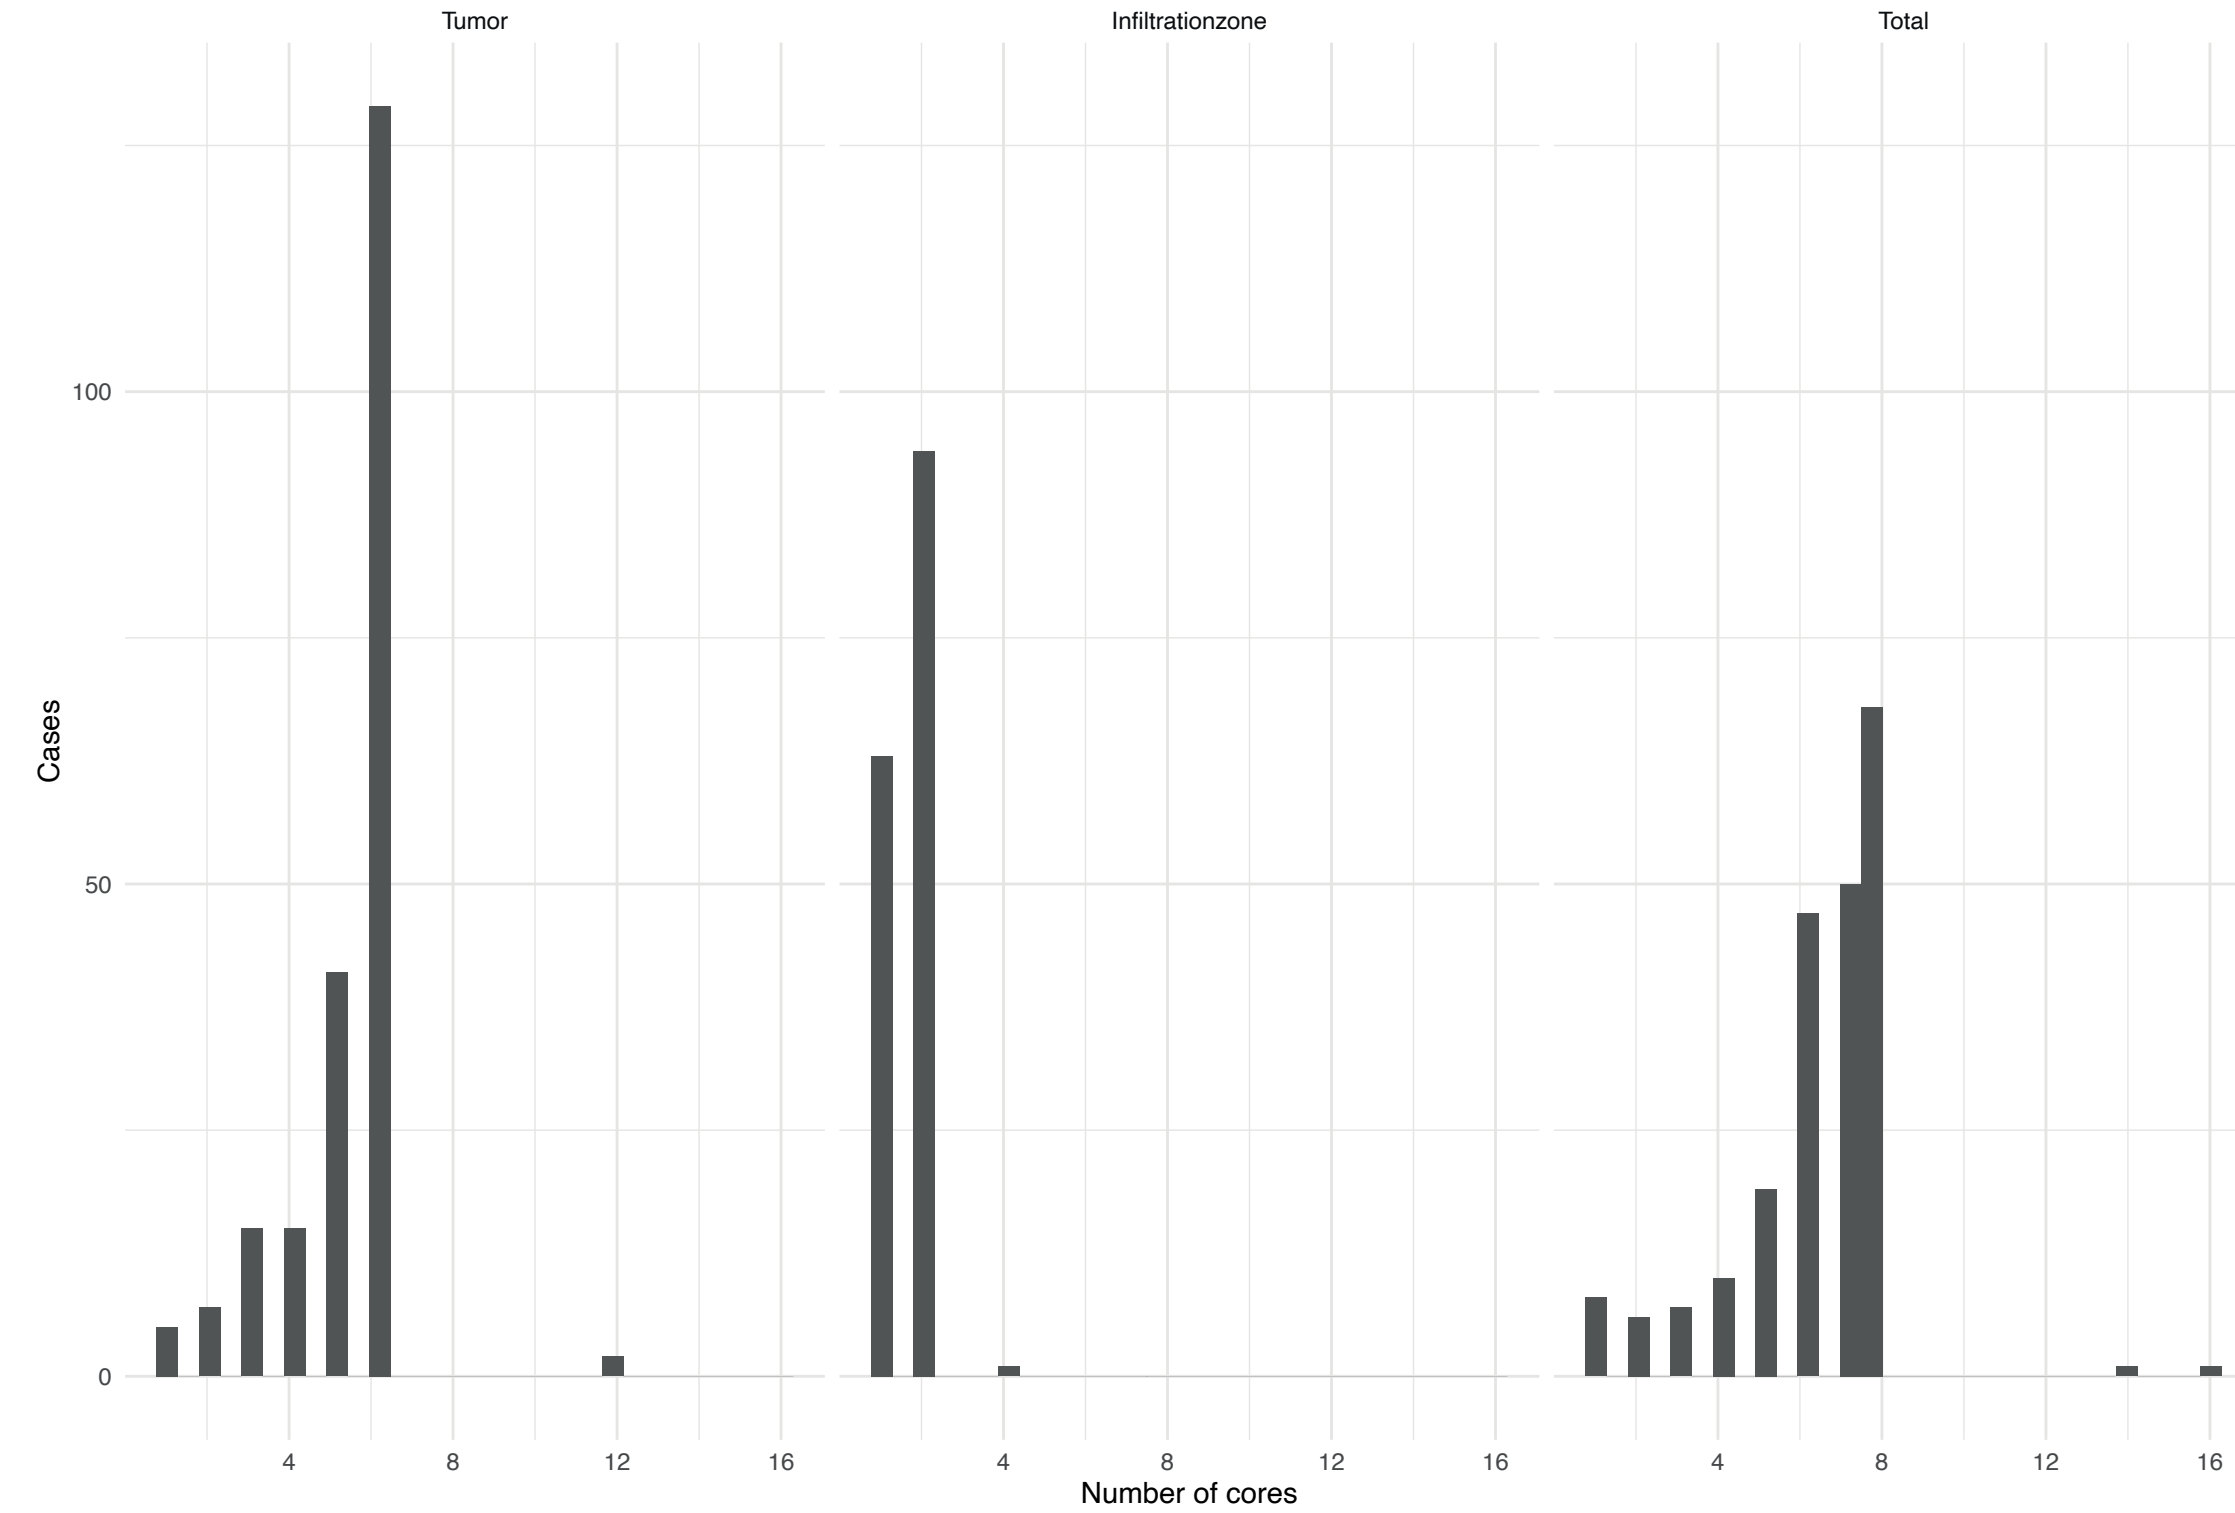

Supplement: s1 [file s1]
