# Supplementary figures and images for: Chaperone-Mediated Autophagy Markers LAMP2A and HSPA8 in Advanced Non-Small Cell Lung Cancer after Neoadjuvant Therapy
Source: MDPI journal article supplement (doi:10.3390/cells10102731), 2021-10-13

**A**

IRS LAMP2A by year of resection

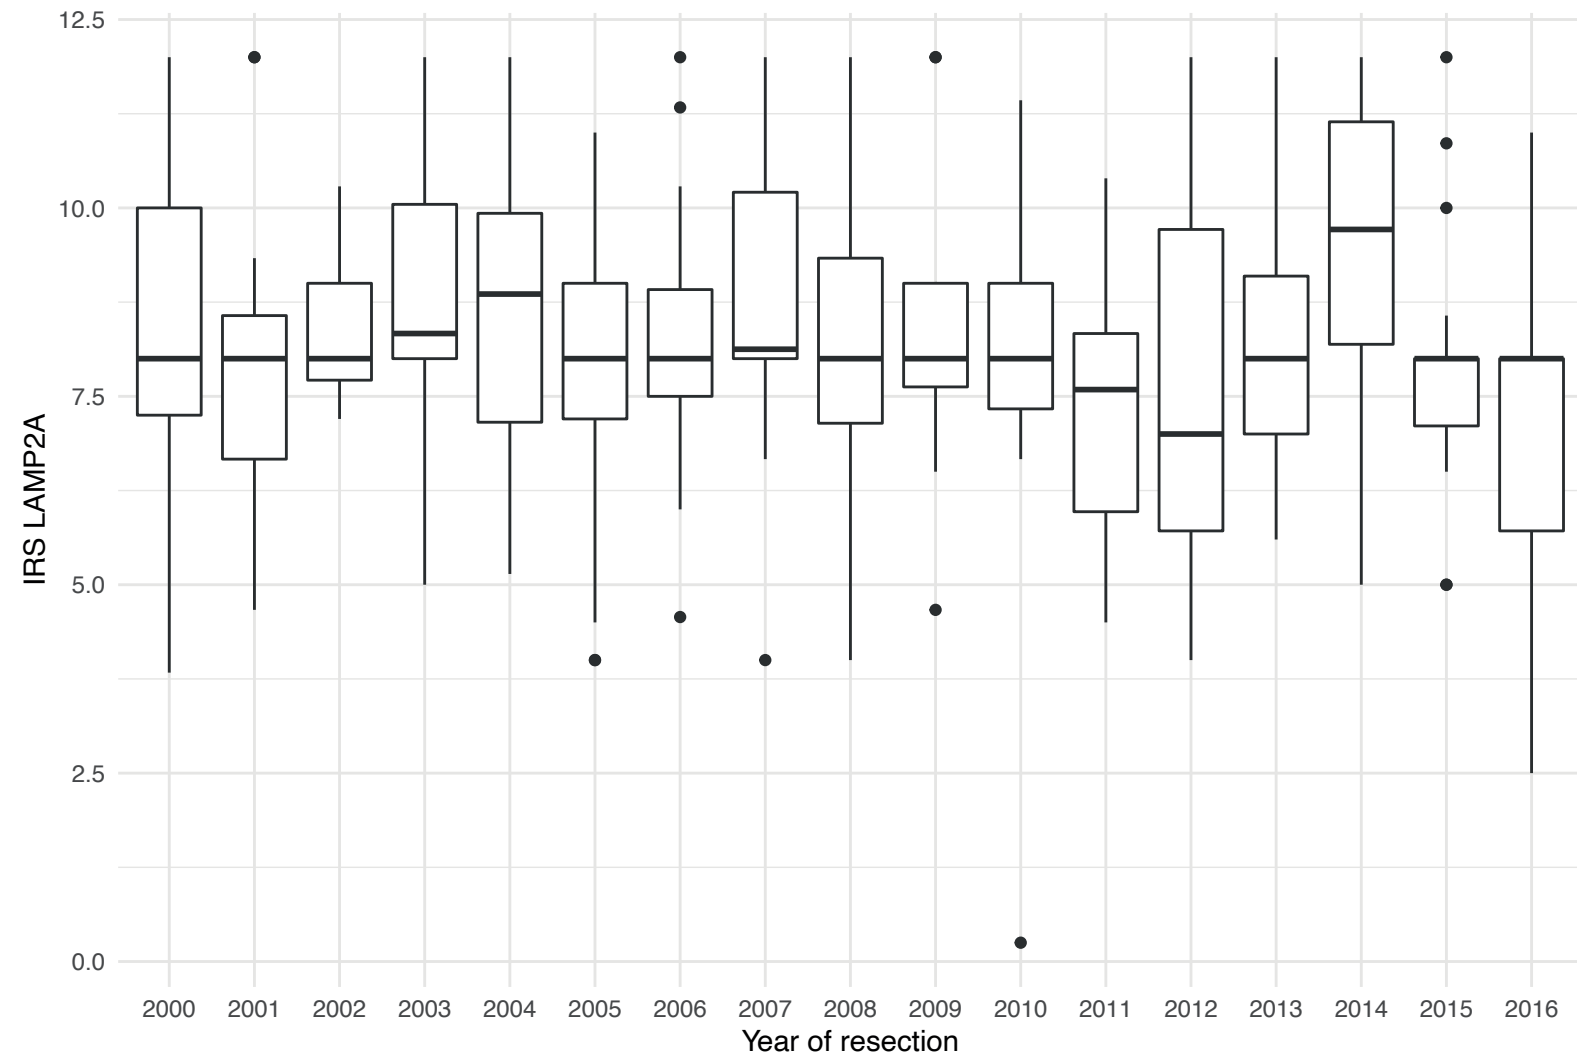**B**

IRS HSPA8 by year of resection

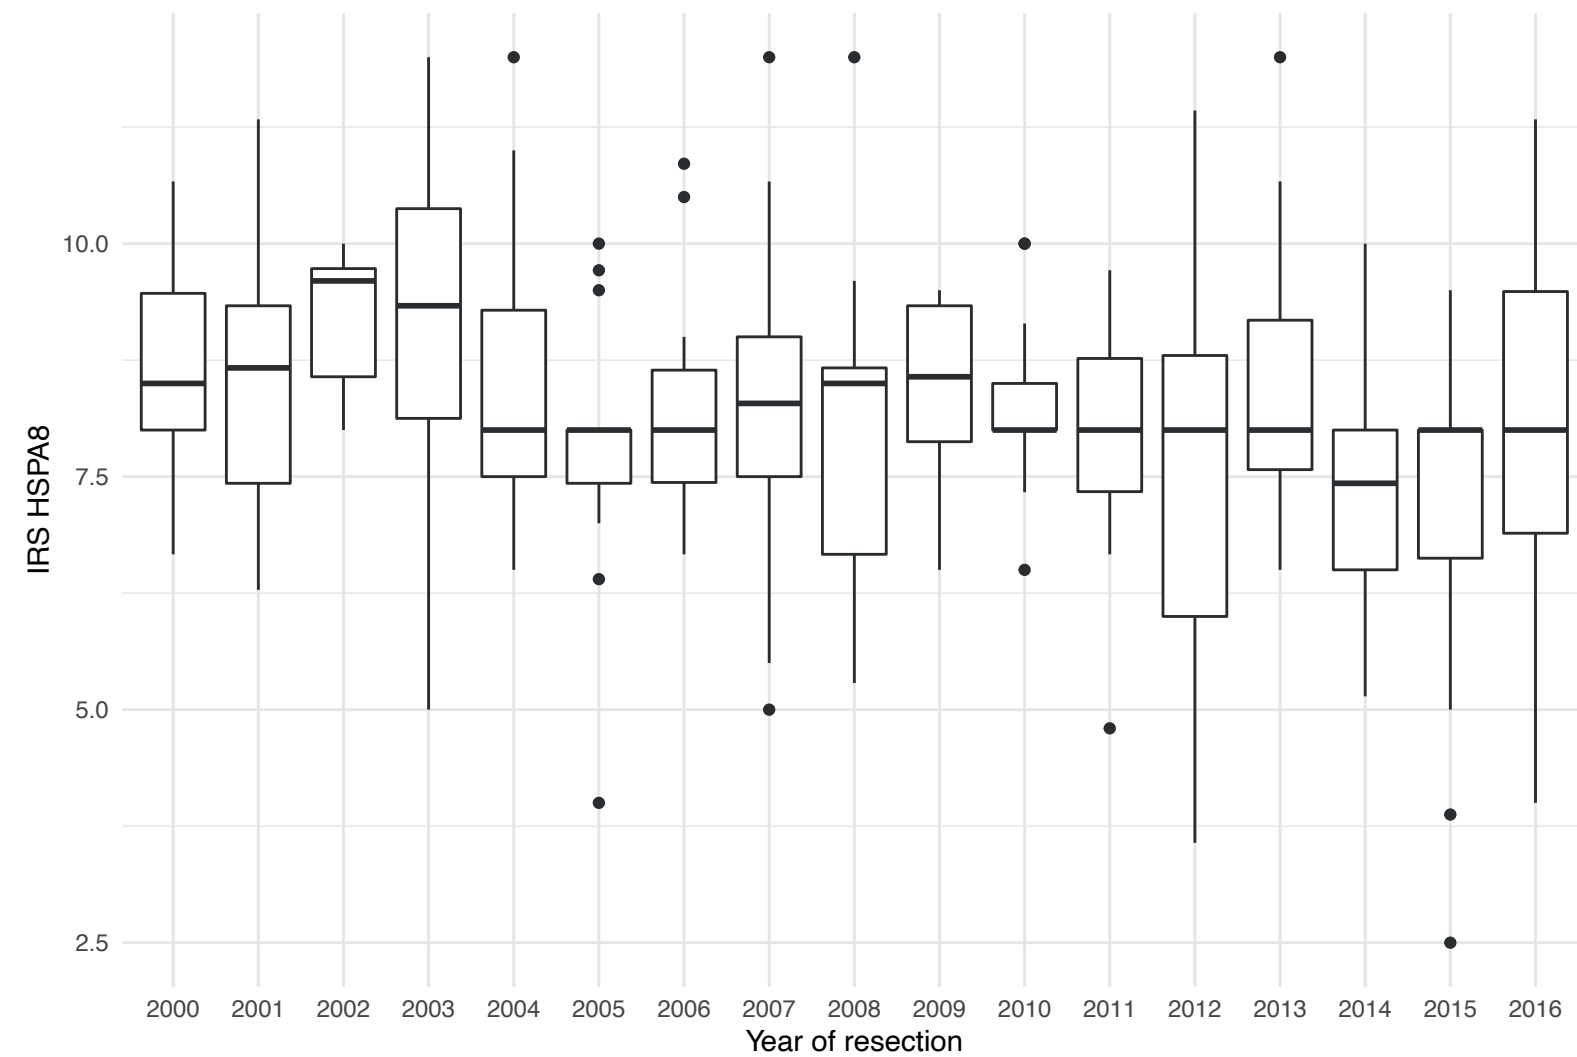

Supplement: s1 [file s1]
